# Supplementary material for: Gender and Social Inequalities in Awareness of Coronary Artery Disease in European Countries
Source: MDPI journal article supplement (doi:10.3390/ijerph19031388), 2022-01-26
Supplement: s1 [file s1]

## SUPPLEMENTARY MATERIAL

**Table S1.** Demographic characteristics of respondents to the CHD awareness survey according to age

|                                                                                                           | Overall           |                   |                   | Males             |                   |                   | Females            |                   |                   |
|-----------------------------------------------------------------------------------------------------------|-------------------|-------------------|-------------------|-------------------|-------------------|-------------------|--------------------|-------------------|-------------------|
|                                                                                                           | According to age  |                   |                   |                   |                   |                   |                    |                   |                   |
| Characteristic (%)                                                                                        | 25-44             | 45-64             | 65+               | 25-44             | 45-64             | 65+               | 25-44              | 45-64             | 65+               |
| <b>Gender</b>                                                                                             |                   |                   |                   |                   |                   |                   |                    |                   |                   |
| Female                                                                                                    | 52.6              | 50.2              | 54.7              |                   |                   |                   |                    |                   |                   |
| Male                                                                                                      | 47.4              | 49.8              | 45.3              |                   |                   |                   |                    |                   |                   |
| <b>Health status</b>                                                                                      |                   |                   |                   |                   |                   |                   |                    |                   |                   |
| Very good                                                                                                 | 30.2 <sup>a</sup> | 17.5 <sup>b</sup> | 13.1 <sup>c</sup> | 30.6 <sup>a</sup> | 17.7 <sup>b</sup> | 12.5 <sup>c</sup> | 29.8 <sup>a</sup>  | 17.5 <sup>b</sup> | 13.5 <sup>c</sup> |
| Good                                                                                                      | 53.7 <sup>a</sup> | 51.2 <sup>a</sup> | 46.3 <sup>b</sup> | 52.0              | 50.2              | 50.7              | 55.2 <sup>a</sup>  | 52.1 <sup>a</sup> | 42.5 <sup>b</sup> |
| Fair                                                                                                      | 13.2 <sup>a</sup> | 24.5 <sup>b</sup> | 33.1 <sup>c</sup> | 14.5 <sup>a</sup> | 23.5 <sup>b</sup> | 28.8 <sup>c</sup> | 12.1 <sup>a</sup>  | 25.4 <sup>b</sup> | 36.8 <sup>c</sup> |
| Bad                                                                                                       | 1.8 <sup>a</sup>  | 5.8 <sup>b</sup>  | 5.9 <sup>b</sup>  | 1.7 <sup>a</sup>  | 7.2 <sup>b</sup>  | 6.7 <sup>b</sup>  | 2.0 <sup>a</sup>   | 4.5 <sup>b</sup>  | 5.4 <sup>b</sup>  |
| Very bad                                                                                                  | 1.1               | 1.0               | 1.6               | 1.3               | 1.4               | 1.4               | 0.9 <sup>a,b</sup> | 0.6 <sup>b</sup>  | 1.8 <sup>a</sup>  |
| <b>Marital status</b>                                                                                     |                   |                   |                   |                   |                   |                   |                    |                   |                   |
| Single                                                                                                    | 26.6 <sup>a</sup> | 13.3 <sup>b</sup> | 7.1 <sup>c</sup>  | 36.3 <sup>a</sup> | 13.9 <sup>b</sup> | 9.1 <sup>c</sup>  | 18.1 <sup>a</sup>  | 12.7 <sup>b</sup> | 5.4 <sup>c</sup>  |
| Married/living together                                                                                   | 68.8 <sup>a</sup> | 70.9 <sup>a</sup> | 60.7 <sup>b</sup> | 60.0 <sup>a</sup> | 74.0 <sup>b</sup> | 73.1 <sup>b</sup> | 76.7 <sup>a</sup>  | 67.9 <sup>b</sup> | 50.4 <sup>c</sup> |
| Divorced/separated                                                                                        | 4.2 <sup>a</sup>  | 11.8 <sup>b</sup> | 6.5 <sup>c</sup>  | 3.3 <sup>a</sup>  | 10.2 <sup>b</sup> | 1.3 <sup>c</sup>  | 5.0 <sup>a</sup>   | 13.4 <sup>b</sup> | 10.9 <sup>b</sup> |
| Widow                                                                                                     | 0.4 <sup>a</sup>  | 4.0 <sup>b</sup>  | 25.7 <sup>c</sup> | 0.4 <sup>a</sup>  | 1.9 <sup>b</sup>  | 16.6 <sup>c</sup> | 0.3 <sup>a</sup>   | 6.0 <sup>b</sup>  | 33.3 <sup>c</sup> |
| <b>Education</b>                                                                                          |                   |                   |                   |                   |                   |                   |                    |                   |                   |
| Compulsory or less                                                                                        | 52.4 <sup>a</sup> | 69.8 <sup>b</sup> | 61.7 <sup>c</sup> | 53.8 <sup>a</sup> | 67.9 <sup>b</sup> | 50.6 <sup>a</sup> | 51.2 <sup>a</sup>  | 71.7 <sup>b</sup> | 71.1 <sup>b</sup> |
| Higher education                                                                                          | 47.6 <sup>a</sup> | 30.2 <sup>b</sup> | 38.3 <sup>c</sup> | 46.2 <sup>a</sup> | 32.1 <sup>b</sup> | 49.4 <sup>a</sup> | 48.8 <sup>a</sup>  | 28.3 <sup>b</sup> | 28.9 <sup>b</sup> |
| <b>Relative socioeconomic status</b>                                                                      |                   |                   |                   |                   |                   |                   |                    |                   |                   |
| High                                                                                                      | 50.5 <sup>a</sup> | 54.0 <sup>b</sup> | 78.0 <sup>c</sup> | 52.0 <sup>a</sup> | 49.6 <sup>a</sup> | 30.6 <sup>b</sup> | 47.3 <sup>a</sup>  | 42.2 <sup>b</sup> | 15.0 <sup>c</sup> |
| Low                                                                                                       | 49.5 <sup>a</sup> | 46.0 <sup>b</sup> | 22.0 <sup>c</sup> | 48.0 <sup>a</sup> | 50.4 <sup>a</sup> | 69.4 <sup>b</sup> | 52.7 <sup>a</sup>  | 57.8 <sup>b</sup> | 85.0 <sup>c</sup> |
| <b>Health insurance</b>                                                                                   |                   |                   |                   |                   |                   |                   |                    |                   |                   |
| Has health coverage                                                                                       | 99.3 <sup>a</sup> | 99.9 <sup>b</sup> | 99.4 <sup>a</sup> | 98.8 <sup>a</sup> | 99.9 <sup>b</sup> | 99.4              | 99.9               | 99.9 <sup>b</sup> | 99.4 <sup>a</sup> |
| <b>Medical history</b>                                                                                    |                   |                   |                   |                   |                   |                   |                    |                   |                   |
| Has suffered from a heart attack                                                                          | 1.1 <sup>a</sup>  | 4.0 <sup>b</sup>  | 12.5 <sup>c</sup> | 0.8 <sup>a</sup>  | 5.8 <sup>b</sup>  | 16.1 <sup>c</sup> | 1.4 <sup>a</sup>   | 2.3 <sup>a</sup>  | 9.4 <sup>b</sup>  |
| Has been diagnosed with a cardiovascular disease                                                          | 4.9 <sup>a</sup>  | 9.6 <sup>b</sup>  | 18.6 <sup>c</sup> | 3.8 <sup>a</sup>  | 13.8 <sup>b</sup> | 20.1 <sup>c</sup> | 5.9 <sup>a</sup>   | 5.3 <sup>a</sup>  | 17.4 <sup>b</sup> |
| Close relative or friend has had a heart attack                                                           | 58.3 <sup>a</sup> | 64.9 <sup>b</sup> | 57.4 <sup>a</sup> | 56.5 <sup>a</sup> | 61.8 <sup>b</sup> | 56.7 <sup>a</sup> | 60.0 <sup>a</sup>  | 68.2 <sup>b</sup> | 57.9 <sup>a</sup> |
| Close relative or friend has had another severe cardiovascular disease                                    | 37.1 <sup>a</sup> | 47.3 <sup>b</sup> | 43.0 <sup>c</sup> | 35.9 <sup>a</sup> | 43.4 <sup>b</sup> | 43.5 <sup>b</sup> | 38.1 <sup>a</sup>  | 51.1 <sup>b</sup> | 42.5 <sup>a</sup> |
| Have you ever taken a screening test to know about your risk of being affected by cardiovascular disease? | 28.4 <sup>a</sup> | 50.1 <sup>b</sup> | 52.3 <sup>b</sup> | 33.8 <sup>a</sup> | 60.8 <sup>b</sup> | 62.3 <sup>b</sup> | 23.6 <sup>a</sup>  | 39.5 <sup>b</sup> | 43.9 <sup>b</sup> |

Superscript letters indicate significant differences ( $p < 0.05$ ). Different letters in adjacent cells indicate significant differences between groups.

**Table S2.** Awareness of selected leading health issues, warning signs of a heart attack and responses to signs of a heart attack, according to age.

| Characteristic (%)                                                                                | According to age  |                   |                   |                    |                   |                     |                   |                   |                   |
|---------------------------------------------------------------------------------------------------|-------------------|-------------------|-------------------|--------------------|-------------------|---------------------|-------------------|-------------------|-------------------|
|                                                                                                   | Overall           |                   |                   | Males              |                   |                     | Females           |                   |                   |
|                                                                                                   | 25-44             | 45-64             | 65+               | 25-44              | 45-64             | 65+                 | 25-44             | 45-64             | 65+               |
| <b>Leading health issue (affecting your gender)</b>                                               |                   |                   |                   |                    |                   |                     |                   |                   |                   |
| Cancer in general                                                                                 | 21.1              | 19.9 <sup>a</sup> | 23.7 <sup>b</sup> | 23.1               | 21.9              | 23.7                | 19.3 <sup>a</sup> | 17.8 <sup>a</sup> | 23.6 <sup>b</sup> |
| Lung cancer                                                                                       | 0.4 <sup>a</sup>  | 1.2 <sup>b</sup>  | 1.1 <sup>b</sup>  | 0.9 <sup>a</sup>   | 2.3 <sup>b</sup>  | 2.2                 | 0.1               | 0.1               | 0.1               |
| Breast cancer                                                                                     | 12.7 <sup>a</sup> | 10.4 <sup>b</sup> | 12.5              |                    |                   |                     | 23.7              | 20.7              | 23.3              |
| Diabetes                                                                                          | 2.2               | 2.9               | 2.6               | 1.5 <sup>a</sup>   | 3.9 <sup>b</sup>  | 2.7                 | 3.0               | 1.8               | 2.5               |
| Heart disease/Heart attack                                                                        | 8.6 <sup>a</sup>  | 12.8 <sup>b</sup> | 13.1 <sup>b</sup> | 15.2 <sup>a</sup>  | 21.2 <sup>b</sup> | 21.6 <sup>b</sup>   | 2.9 <sup>a</sup>  | 4.5               | 5.7 <sup>b</sup>  |
| Obesity                                                                                           | 7.8               | 8.7 <sup>a</sup>  | 6.5 <sup>b</sup>  | 10.2               | 9.8               | 9.9                 | 5.7               | 7.4 <sup>a</sup>  | 3.6 <sup>b</sup>  |
| <b>Leading cause of death (affecting your gender)</b>                                             |                   |                   |                   |                    |                   |                     |                   |                   |                   |
| Accidental death                                                                                  | 3.4 <sup>a</sup>  | 0.7 <sup>b</sup>  | 0.7 <sup>b</sup>  | 5.8 <sup>a</sup>   | 1.3 <sup>b</sup>  | 1.3 <sup>b</sup>    | 1.1 <sup>a</sup>  | 0.1 <sup>b</sup>  | 0.1 <sup>b</sup>  |
| Alzheimer's                                                                                       | 0.1 <sup>a</sup>  | 0.5 <sup>b</sup>  | 0.2               | 0.1                | 0.4               | 0.0                 | 0.1               | 0.6               | 0.4               |
| Lung cancer                                                                                       | 1.7 <sup>a</sup>  | 2.5               | 3.0 <sup>b</sup>  | 2.9 <sup>a</sup>   | 3.1 <sup>a</sup>  | 5.8 <sup>b</sup>    | 0.6 <sup>a</sup>  | 1.9 <sup>b</sup>  | 0.4 <sup>a</sup>  |
| Breast cancer                                                                                     | 8.6               | 7.8 <sup>a</sup>  | 10.0 <sup>b</sup> |                    |                   |                     | 16.6              | 16.1              | 18.7              |
| Cancer in general                                                                                 | 39.9 <sup>a</sup> | 36.0 <sup>b</sup> | 32.1 <sup>c</sup> | 26.2 <sup>a</sup>  | 23.1 <sup>a</sup> | 18.5 <sup>b</sup>   | 52.6 <sup>a</sup> | 49.5 <sup>a</sup> | 44.0 <sup>b</sup> |
| Heart disease/Heart attack                                                                        | 26.9 <sup>a</sup> | 36.4 <sup>b</sup> | 34.9 <sup>b</sup> | 41.9 <sup>a</sup>  | 53.4 <sup>b</sup> | 54.3 <sup>b</sup>   | 12.8 <sup>a</sup> | 18.6 <sup>b</sup> | 18.1 <sup>b</sup> |
| Stroke                                                                                            | 5.5 <sup>a</sup>  | 3.9 <sup>b</sup>  | 5.8 <sup>a</sup>  | 5.3 <sup>a,b</sup> | 3.6 <sup>b</sup>  | 7.4 <sup>a</sup>    | 5.7               | 4.2               | 4.5               |
| <b>What are the warning signs that you associate with having a heart attack?</b>                  |                   |                   |                   |                    |                   |                     |                   |                   |                   |
| Chest pain (discomfort and sharp)                                                                 | 57.1 <sup>a</sup> | 61.5 <sup>b</sup> | 57.5 <sup>a</sup> | 56.7 <sup>a</sup>  | 64.4 <sup>b</sup> | 59.9 <sup>a,b</sup> | 57.4              | 58.6              | 55.6              |
| Radiation of pain                                                                                 | 44.1 <sup>a</sup> | 49.6 <sup>b</sup> | 41.8 <sup>a</sup> | 37.6 <sup>a</sup>  | 48.4 <sup>b</sup> | 39.4 <sup>a</sup>   | 49.9 <sup>a</sup> | 50.9 <sup>a</sup> | 43.7 <sup>b</sup> |
| Dyspnea (shortness of breath)                                                                     | 20.2 <sup>a</sup> | 19.2 <sup>a</sup> | 15.9 <sup>b</sup> | 15.8 <sup>a</sup>  | 19.7 <sup>b</sup> | 16.1                | 24.2 <sup>a</sup> | 18.7 <sup>b</sup> | 15.6 <sup>b</sup> |
| Nausea                                                                                            | 6.3 <sup>a</sup>  | 12.3 <sup>b</sup> | 7.9 <sup>a</sup>  | 4.1 <sup>a</sup>   | 7.5 <sup>b</sup>  | 3.5 <sup>a</sup>    | 8.3 <sup>a</sup>  | 17.1 <sup>b</sup> | 11.6 <sup>c</sup> |
| Sweating                                                                                          | 5.0 <sup>a</sup>  | 8.9 <sup>b</sup>  | 4.3 <sup>a</sup>  | 5.7 <sup>a</sup>   | 12.7 <sup>b</sup> | 6.5 <sup>a</sup>    | 4.3 <sup>a</sup>  | 5.1 <sup>a</sup>  | 2.4 <sup>b</sup>  |
| Unusual fatigue                                                                                   | 5.3 <sup>a</sup>  | 3.6 <sup>b</sup>  | 5.8 <sup>a</sup>  | 4.9                | 3.8 <sup>a</sup>  | 6.4 <sup>b</sup>    | 5.6 <sup>a</sup>  | 3.4 <sup>b</sup>  | 5.4 <sup>a</sup>  |
| Dizziness                                                                                         | 17.8 <sup>a</sup> | 11.3 <sup>b</sup> | 9.4 <sup>b</sup>  | 20.8 <sup>a</sup>  | 11.9 <sup>b</sup> | 9.6 <sup>b</sup>    | 15.0 <sup>a</sup> | 10.7 <sup>b</sup> | 9.4 <sup>b</sup>  |
| Generalised weakness                                                                              | 8.1 <sup>a</sup>  | 4.4 <sup>b</sup>  | 4.1 <sup>b</sup>  | 9.7 <sup>a</sup>   | 5.1 <sup>b</sup>  | 5.2 <sup>b</sup>    | 6.7 <sup>a</sup>  | 3.7 <sup>b</sup>  | 3.2 <sup>b</sup>  |
| Palpitations                                                                                      | 11.3 <sup>a</sup> | 9.5 <sup>b</sup>  | 5.7 <sup>c</sup>  | 10.7 <sup>a</sup>  | 7.6 <sup>b</sup>  | 5.0 <sup>c</sup>    | 11.8 <sup>a</sup> | 11.4 <sup>a</sup> | 6.3 <sup>b</sup>  |
| <b>Knows the main symptoms<sup>1</sup></b>                                                        | 19.0 <sup>a</sup> | 14.7 <sup>b</sup> | 13.3 <sup>b</sup> | 19.2 <sup>a</sup>  | 16.5 <sup>a</sup> | 12.3 <sup>b</sup>   | 18.9 <sup>a</sup> | 13.0 <sup>b</sup> | 14.1 <sup>b</sup> |
| <b>If you thought you were experiencing a heart attack, what is the first thing you would do?</b> |                   |                   |                   |                    |                   |                     |                   |                   |                   |
| Take an aspirin                                                                                   | 0.5 <sup>a</sup>  | 1.1               | 1.5 <sup>b</sup>  | 0.3 <sup>a</sup>   | 0.9               | 1.4 <sup>b</sup>    | 0.7               | 1.3               | 1.5               |
| Go to a hospital                                                                                  | 7.6 <sup>a</sup>  | 10.9 <sup>b</sup> | 10.4 <sup>b</sup> | 5.5 <sup>a</sup>   | 11.6 <sup>b</sup> | 10.8 <sup>b</sup>   | 9.5               | 10.2              | 10.2              |
| Call a doctor                                                                                     | 14.8 <sup>a</sup> | 15.2 <sup>a</sup> | 18.4 <sup>b</sup> | 14.8               | 14.8              | 15.6                | 14.8 <sup>a</sup> | 15.5 <sup>a</sup> | 20.8 <sup>b</sup> |
| Call emergency medical services (112)                                                             | 58.3 <sup>a</sup> | 55.7              | 53.6 <sup>b</sup> | 58.6 <sup>a</sup>  | 51.3 <sup>b</sup> | 54.0                | 58.2 <sup>a</sup> | 60.1 <sup>a</sup> | 53.3 <sup>b</sup> |
| Call your spouse or a family member                                                               | 10.4 <sup>a</sup> | 6.4 <sup>b</sup>  | 6.6 <sup>b</sup>  | 12.4 <sup>a</sup>  | 7.1 <sup>b</sup>  | 6.2 <sup>b</sup>    | 8.4 <sup>a</sup>  | 5.7 <sup>b</sup>  | 6.7               |
| Other                                                                                             | 6.4 <sup>a</sup>  | 8.3 <sup>b</sup>  | 6.8               | 7.1 <sup>a</sup>   | 11.5 <sup>b</sup> | 9.6                 | 5.8               | 5.2               | 4.5               |
| Don't know                                                                                        | 1.9               | 2.5               | 2.7               | 1.3 <sup>a</sup>   | 2.9 <sup>b</sup>  | 2.3                 | 2.5               | 2.1               | 2.9               |
| Call ambulance versus any other response                                                          | 58.3 <sup>a</sup> | 55.7              | 53.6 <sup>b</sup> | 58.5 <sup>a</sup>  | 51.3 <sup>b</sup> | 54.0                | 58.3 <sup>a</sup> | 60.1 <sup>a</sup> | 53.4 <sup>b</sup> |

<sup>1</sup> **Main symptoms:** chest pain, radiation of pain, dyspnea, unusual fatigue, dizziness or generalized weakness. To be considered correct respondents had to provide three of the aforementioned, of which at least one had to be chest pain or radiation of pain.

Superscript letters indicate significant differences ( $p < 0.05$ ). Different letters in adjacent cells indicate significant differences between groups.

**Table S3.** Main risk factors, preventive actions and individuals most at risk in relation to cardiovascular disease, according to age

|                                                                                      | Age               |                   |                   |                   |                   |                   |                   |                   |                   |
|--------------------------------------------------------------------------------------|-------------------|-------------------|-------------------|-------------------|-------------------|-------------------|-------------------|-------------------|-------------------|
|                                                                                      | Overall           |                   |                   | Males             |                   |                   | Females           |                   |                   |
| Response (%)                                                                         | 25-44             | 45-64             | 65+               | 25-44             | 45-64             | 65+               | 25-44             | 45-64             | 65+               |
| <b>Main risk factors for suffering cardiovascular disease</b>                        |                   |                   |                   |                   |                   |                   |                   |                   |                   |
| High blood pressure                                                                  | 12.0 <sup>a</sup> | 18.3 <sup>b</sup> | 14.2 <sup>a</sup> | 9.5               | 11.9 <sup>a</sup> | 6.8 <sup>b</sup>  | 14.4 <sup>a</sup> | 23.1 <sup>b</sup> | 17.3 <sup>a</sup> |
| Cholesterol                                                                          | 7.8               | 8.8               | 8.2               | 6.5               | 4.4               | 5.8               | 8.4 <sup>a</sup>  | 13.0 <sup>b</sup> | 9.4 <sup>a</sup>  |
| Family history of heart disease or stroke                                            | 16.5 <sup>a</sup> | 12.7 <sup>b</sup> | 8.9 <sup>c</sup>  | 14.5 <sup>a</sup> | 10.2 <sup>b</sup> | 6.8 <sup>c</sup>  | 18.8 <sup>a</sup> | 15.3 <sup>b</sup> | 11.9 <sup>c</sup> |
| Smoking habit                                                                        | 59.0 <sup>a</sup> | 67.7 <sup>b</sup> | 55.6 <sup>c</sup> | 54.8 <sup>a</sup> | 60.2 <sup>b</sup> | 47.8 <sup>c</sup> | 58.8 <sup>a</sup> | 66.4 <sup>b</sup> | 52.2 <sup>c</sup> |
| Drinking alcohol                                                                     | 35.2 <sup>a</sup> | 42.0 <sup>b</sup> | 32.9 <sup>a</sup> | 36.0 <sup>a</sup> | 37.2 <sup>a</sup> | 29.1 <sup>b</sup> | 28.9 <sup>a</sup> | 30.5 <sup>a</sup> | 22.3 <sup>b</sup> |
| Diabetes                                                                             | 5.3               | 5.5               | 5.8               | 3.8               | 2.4 <sup>a</sup>  | 4.7 <sup>b</sup>  | 7.1               | 8.2               | 6.2               |
| Unhealthy diet habits                                                                | 49.0 <sup>a</sup> | 37.6 <sup>b</sup> | 30.4 <sup>c</sup> | 45.3 <sup>a</sup> | 35.9 <sup>b</sup> | 26.6 <sup>c</sup> | 52.2 <sup>a</sup> | 37.3 <sup>b</sup> | 28.9 <sup>c</sup> |
| Not exercising                                                                       | 48.6 <sup>a</sup> | 40.0 <sup>b</sup> | 34.0 <sup>c</sup> | 41.4 <sup>a</sup> | 39.4 <sup>a</sup> | 27.2 <sup>b</sup> | 48.6 <sup>a</sup> | 36.7 <sup>b</sup> | 33.6 <sup>b</sup> |
| Obesity                                                                              | 34.2 <sup>a</sup> | 37.8 <sup>b</sup> | 29.1 <sup>c</sup> | 31.9 <sup>a</sup> | 32.4 <sup>a</sup> | 26.8 <sup>b</sup> | 36.6 <sup>a</sup> | 42.4 <sup>b</sup> | 29.8 <sup>c</sup> |
| Stress                                                                               | 67.2 <sup>a</sup> | 65.4 <sup>a</sup> | 54.9 <sup>b</sup> | 61.9 <sup>a</sup> | 56.5 <sup>b</sup> | 49.7 <sup>c</sup> | 67.1 <sup>a</sup> | 64.4 <sup>a</sup> | 53.7 <sup>b</sup> |
| Other                                                                                | 14.2 <sup>a</sup> | 11.4 <sup>b</sup> | 11.3 <sup>b</sup> | 13.3 <sup>a</sup> | 9.7 <sup>b</sup>  | 6.8 <sup>c</sup>  | 9.0               | 11.0              | 12.3              |
| <b>Preventive action</b>                                                             |                   |                   |                   |                   |                   |                   |                   |                   |                   |
| Eating more fruit and vegetables                                                     | 46.2              | 44.1              | 44.1              | 45.4              | 41.9              | 43.1              | 47.0              | 46.3              | 44.9              |
| Physical activity                                                                    | 72.7 <sup>a</sup> | 68.2 <sup>b</sup> | 56.2 <sup>c</sup> | 74.6 <sup>a</sup> | 66.8 <sup>b</sup> | 59.2 <sup>c</sup> | 70.9 <sup>a</sup> | 69.6 <sup>a</sup> | 53.7 <sup>b</sup> |
| Regular medical check-ups                                                            | 34.7 <sup>a</sup> | 26.9 <sup>b</sup> | 25.3 <sup>b</sup> | 28.8              | 27.3              | 28.2              | 40.1 <sup>a</sup> | 26.4 <sup>b</sup> | 22.9 <sup>b</sup> |
| Keep a healthy weight                                                                | 36.0              | 37.2              | 35.7              | 37.2 <sup>a</sup> | 41.6 <sup>b</sup> | 31.7 <sup>c</sup> | 34.9              | 32.8 <sup>a</sup> | 39.0 <sup>b</sup> |
| Not smoking                                                                          | 49.7 <sup>a</sup> | 50.8 <sup>a</sup> | 44.9 <sup>b</sup> | 52.1 <sup>a</sup> | 53.7 <sup>a</sup> | 44.3 <sup>b</sup> | 47.4              | 47.8              | 45.4              |
| Improve stress management                                                            | 25.1              | 26.5              | 23.1              | 26.8              | 27.0              | 26.2              | 23.5              | 26.0 <sup>a</sup> | 20.6 <sup>b</sup> |
| Hypertension control                                                                 | 18.3 <sup>a</sup> | 24.5 <sup>b</sup> | 34.1 <sup>c</sup> | 16.8 <sup>a</sup> | 21.3 <sup>b</sup> | 30.0 <sup>c</sup> | 19.5 <sup>a</sup> | 27.7 <sup>b</sup> | 37.6 <sup>c</sup> |
| Taking vitamins                                                                      | 1.8               | 2.1               | 1.5               | 2.7 <sup>a</sup>  | 0.9 <sup>b</sup>  | 0.6 <sup>b</sup>  | 0.9 <sup>a</sup>  | 3.2 <sup>b</sup>  | 2.5 <sup>b</sup>  |
| Taking antioxidants                                                                  | 1.0               | 1.1               | 1.0               | 1.7 <sup>a</sup>  | 0.3 <sup>b</sup>  | 1.0 <sup>a</sup>  | 0.5 <sup>a</sup>  | 1.9 <sup>b</sup>  | 0.8 <sup>a</sup>  |
| Hormone replacement therapy                                                          | 0.3               | 0.1               | 0.4               | 0.7 <sup>a</sup>  | 0.1 <sup>b</sup>  | 0.1               | 0.0 <sup>a</sup>  | 0.1 <sup>a</sup>  | 0.6 <sup>b</sup>  |
| Diabetes control                                                                     | 5.2 <sup>a</sup>  | 6.6 <sup>b</sup>  | 16.0 <sup>c</sup> | 5.4 <sup>a</sup>  | 6.8 <sup>a</sup>  | 18.7 <sup>b</sup> | 5.0 <sup>a</sup>  | 6.4 <sup>a</sup>  | 13.7 <sup>b</sup> |
| Don't know                                                                           | 0.8 <sup>a</sup>  | 0.5 <sup>a</sup>  | 1.6 <sup>b</sup>  | 0.5 <sup>a</sup>  | 0.8 <sup>a</sup>  | 2.3 <sup>b</sup>  | 1.0 <sup>a</sup>  | 0.2 <sup>b</sup>  | 1.1 <sup>a</sup>  |
| <b>Individuals who are most at risk of suffering from cardiovascular disease</b>     |                   |                   |                   |                   |                   |                   |                   |                   |                   |
| Men have more heart diseases than women                                              | 75.4              | 73.9              | 75.6              | 80.1              | 79.4              | 81.6              | 71.1              | 68.5              | 70.4              |
| Men that are highly stressed executive professionals are more prone to heart attacks | 86.7 <sup>a</sup> | 84.2 <sup>b</sup> | 87.7 <sup>a</sup> | 87.6 <sup>a</sup> | 83.2 <sup>b</sup> | 87.3 <sup>a</sup> | 85.9              | 85.2              | 88.0              |
| Young women, under 50, do not have heart attacks                                     | 20.4 <sup>a</sup> | 21.6 <sup>a</sup> | 29.3 <sup>b</sup> | 22.2 <sup>a</sup> | 26.3 <sup>b</sup> | 29.7 <sup>b</sup> | 18.9 <sup>a</sup> | 17.0 <sup>a</sup> | 28.8 <sup>b</sup> |
| In women the probability of heart disease increases after menopause                  | 65.9              | 67.0              | 69.6              | 63.9 <sup>a</sup> | 63.1 <sup>a</sup> | 70.6 <sup>b</sup> | 67.5              | 70.5              | 68.8              |
| Only women who adopt behaviors and lifestyles of men will have heart disease         | 17.8 <sup>a</sup> | 23.4 <sup>b</sup> | 32.5 <sup>c</sup> | 21.3 <sup>a</sup> | 22.3 <sup>a</sup> | 33.6 <sup>b</sup> | 14.7 <sup>a</sup> | 24.5 <sup>b</sup> | 31.5 <sup>c</sup> |
| Only women which have brought up children will have heart disease                    | 3.5 <sup>a</sup>  | 3.8 <sup>a</sup>  | 6.2 <sup>b</sup>  | 5.1 <sup>a</sup>  | 3.1 <sup>b</sup>  | 6.4 <sup>a</sup>  | 2.0 <sup>a</sup>  | 4.4 <sup>b</sup>  | 6.1 <sup>b</sup>  |

Superscript letters indicate significant differences ( $p < 0.05$ ). Different letters in adjacent cells indicate significant differences between groups.

**Table S4.** Demographic characteristics of respondents to the CHD awareness survey, according to socioeconomic status.

|                                                                                                           | Overall              |        | Male               |                    | Female             |                    |
|-----------------------------------------------------------------------------------------------------------|----------------------|--------|--------------------|--------------------|--------------------|--------------------|
|                                                                                                           | Socioeconomic status |        |                    |                    |                    |                    |
| Characteristic (%)                                                                                        | Low                  | High   | Low                | High               | Low                | High               |
| <b>Gender</b>                                                                                             |                      |        |                    |                    |                    |                    |
| Male                                                                                                      | 44.7**               | 54.3** |                    |                    |                    |                    |
| Female                                                                                                    | 55.3**               | 45.7** |                    |                    |                    |                    |
| <b>Age</b>                                                                                                |                      |        |                    |                    |                    |                    |
| 25-44 years                                                                                               | 30.3**               | 42.5** | 30.6 <sup>xx</sup> | 38.9 <sup>xx</sup> | 30.1 <sup>xx</sup> | 46.7 <sup>xx</sup> |
| 45-64 years                                                                                               | 36.0**               | 43.9** | 39.2 <sup>xx</sup> | 45.3 <sup>xx</sup> | 33.4 <sup>xx</sup> | 42.2 <sup>xx</sup> |
| 65 and over                                                                                               | 33.7**               | 13.6** | 30.3 <sup>xx</sup> | 15.7 <sup>xx</sup> | 36.5 <sup>xx</sup> | 11.1 <sup>xx</sup> |
| <b>Health status</b>                                                                                      |                      |        |                    |                    |                    |                    |
| Very good                                                                                                 | 14.0**               | 30.9** | 13.2 <sup>xx</sup> | 29.8 <sup>xx</sup> | 14.7 <sup>xx</sup> | 32.3 <sup>xx</sup> |
| Good                                                                                                      | 50.8                 | 51.3   | 51.5               | 51.4               | 50.3               | 51.1               |
| Fair                                                                                                      | 26.9**               | 15.5** | 24.4 <sup>xx</sup> | 17.5 <sup>xx</sup> | 29.0 <sup>xx</sup> | 13.1 <sup>xx</sup> |
| Bad                                                                                                       | 6.4**                | 2.1**  | 8.6 <sup>xx</sup>  | 1.1 <sup>xx</sup>  | 4.7                | 3.3                |
| Very bad                                                                                                  | 1.8**                | 0.2**  | 2.5 <sup>xx</sup>  | 0.2 <sup>xx</sup>  | 1.3 <sup>xx</sup>  | 0.2 <sup>xx</sup>  |
| <b>Marital status</b>                                                                                     |                      |        |                    |                    |                    |                    |
| Single                                                                                                    | 20.8**               | 10.3** | 27.4 <sup>xx</sup> | 10.8 <sup>xx</sup> | 15.5 <sup>xx</sup> | 9.6 <sup>xx</sup>  |
| Married/living together                                                                                   | 55.3**               | 82.4** | 56.8 <sup>xx</sup> | 82.7 <sup>xx</sup> | 54.0 <sup>xx</sup> | 82.2 <sup>xx</sup> |
| Divorced/separated                                                                                        | 11.4**               | 3.8**  | 7.7 <sup>xx</sup>  | 4.3 <sup>xx</sup>  | 14.5 <sup>xx</sup> | 3.2 <sup>xx</sup>  |
| Widow                                                                                                     | 12.5**               | 3.5**  | 8.1 <sup>xx</sup>  | 2.2 <sup>xx</sup>  | 16.1 <sup>xx</sup> | 5.0 <sup>xx</sup>  |
| <b>Highest educational level</b>                                                                          |                      |        |                    |                    |                    |                    |
| Compulsory or less                                                                                        | 74.1**               | 45.0** | 71.3 <sup>xx</sup> | 45.3 <sup>xx</sup> | 76.4 <sup>xx</sup> | 44.6 <sup>xx</sup> |
| Higher education                                                                                          | 25.9**               | 55.0** | 28.7 <sup>xx</sup> | 54.7 <sup>xx</sup> | 23.6 <sup>xx</sup> | 55.4 <sup>xx</sup> |
| <b>Medical insurance</b>                                                                                  |                      |        |                    |                    |                    |                    |
| Has health coverage                                                                                       | 99.4                 | 99.8   | 99.1               | 99.7               | 99.7               | 99.9               |
| <b>Medical history</b>                                                                                    |                      |        |                    |                    |                    |                    |
| Has suffered from a heart attack                                                                          | 6.8**                | 3.6**  | 7.5 <sup>x</sup>   | 5.5 <sup>x</sup>   | 6.1 <sup>xx</sup>  | 1.2 <sup>xx</sup>  |
| Has been diagnosed with a cardiovascular disease (other than heart attack)                                | 12.0**               | 7.6**  | 14.7 <sup>xx</sup> | 7.9 <sup>xx</sup>  | 9.9 <sup>x</sup>   | 7.3 <sup>x</sup>   |
| Close relative or friend has had a heart attack                                                           | 59.3*                | 62.8*  | 59.1               | 61.5               | 59.5 <sup>x</sup>  | 64.5 <sup>x</sup>  |
| Close relative or friend has had another severe cardiovascular disease                                    | 42.1                 | 44.6   | 42.6               | 41.6               | 41.7 <sup>x</sup>  | 48.3 <sup>x</sup>  |
| Have you ever taken a screening test to know about your risk of being affected by cardiovascular disease? | 41.8**               | 45.1** | 47.9 <sup>xx</sup> | 55.9 <sup>xx</sup> | 36.9 <sup>x</sup>  | 32.1 <sup>x</sup>  |

\*,<sup>x</sup> Denotes significant difference between adjacent columns at  $p < 0.05$ .

<sup>xx</sup>,\*\* Denotes significant difference between adjacent columns at  $p < 0.001$

**Table S5.** Demographic characteristics of respondents to the CHD awareness survey, according to **education**.

|                                                                                                           | Overall                |        | Male                |                    | Female              |                    |
|-----------------------------------------------------------------------------------------------------------|------------------------|--------|---------------------|--------------------|---------------------|--------------------|
|                                                                                                           | According to education |        |                     |                    |                     |                    |
| Characteristic (%)                                                                                        | Compulsory or lower    | Higher | Compulsory or lower | Higher             | Compulsory or lower | Higher             |
| <b>Gender</b>                                                                                             |                        |        |                     |                    |                     |                    |
| Male                                                                                                      | 45.6**                 | 51.6** |                     |                    |                     |                    |
| Female                                                                                                    | 54.5**                 | 48.4** |                     |                    |                     |                    |
| <b>Age</b>                                                                                                |                        |        |                     |                    |                     |                    |
| 25-44 years                                                                                               | 28.9**                 | 42.4** | 30.8 <sup>xx</sup>  | 37.7 <sup>xx</sup> | 27.4 <sup>xx</sup>  | 47.4 <sup>xx</sup> |
| 45-64 years                                                                                               | 44.7**                 | 31.2** | 47.6 <sup>xx</sup>  | 32.2 <sup>xx</sup> | 42.2 <sup>xx</sup>  | 30.2 <sup>xx</sup> |
| 65 and over                                                                                               | 26.4                   | 26.4   | 21.6 <sup>xx</sup>  | 30.2 <sup>xx</sup> | 30.4 <sup>xx</sup>  | 22.5 <sup>xx</sup> |
| <b>Health status</b>                                                                                      |                        |        |                     |                    |                     |                    |
| Very good                                                                                                 | 17.3**                 | 26.3** | 17.0 <sup>xx</sup>  | 26.6 <sup>xx</sup> | 17.6 <sup>xx</sup>  | 26.1 <sup>xx</sup> |
| Good                                                                                                      | 48.2**                 | 54.9** | 51.0                | 51.7               | 46.0 <sup>xx</sup>  | 58.3 <sup>xx</sup> |
| Fair                                                                                                      | 26.9**                 | 15.9** | 23.3 <sup>xx</sup>  | 18.2 <sup>xx</sup> | 29.9 <sup>xx</sup>  | 13.5 <sup>xx</sup> |
| Bad                                                                                                       | 5.9**                  | 2.4**  | 6.8 <sup>xx</sup>   | 3.1 <sup>xx</sup>  | 5.2 <sup>xx</sup>   | 1.7 <sup>xx</sup>  |
| Very bad                                                                                                  | 1.7**                  | 0.4**  | 2.0 <sup>xx</sup>   | 0.4 <sup>xx</sup>  | 1.4 <sup>xx</sup>   | 0.5 <sup>xx</sup>  |
| <b>Marital status</b>                                                                                     |                        |        |                     |                    |                     |                    |
| Single                                                                                                    | 14.1**                 | 19.5** | 19.3                | 21.2               | 9.7 <sup>xx</sup>   | 17.8 <sup>xx</sup> |
| Married/living together                                                                                   | 67.3                   | 67.6   | 69.5                | 68.6               | 65.6                | 66.6               |
| Divorced/separated                                                                                        | 9.6**                  | 5.3**  | 6.9 <sup>x</sup>    | 4.0 <sup>x</sup>   | 11.8 <sup>xx</sup>  | 6.6 <sup>xx</sup>  |
| Widow                                                                                                     | 9.1**                  | 7.6**  | 4.4 <sup>x</sup>    | 6.2 <sup>x</sup>   | 13.0 <sup>xx</sup>  | 9.0 <sup>xx</sup>  |
| <b>Health insurance</b>                                                                                   |                        |        |                     |                    |                     |                    |
| Has health coverage                                                                                       | 99.5                   | 99.6   | 99.2                | 99.6               | 99.8                | 99.7               |
| Has suffered from a heart attack                                                                          | 6.4**                  | 3.6**  | 7.2                 | 6.1                | 5.7 <sup>xx</sup>   | 1.0 <sup>xx</sup>  |
| Has been diagnosed with a cardiovascular disease                                                          | 10.8*                  | 8.7*   | 12.8                | 11.2               | 9.1 <sup>x</sup>    | 6.1 <sup>x</sup>   |
| Close relative or friend has had a heart attack                                                           | 61.9                   | 60.0   | 59.8                | 57.8               | 63.7                | 62.3               |
| Close relative or friend has had another severe cardiovascular disease                                    | 40.6**                 | 46.2** | 40.3                | 42.3               | 41.0 <sup>xx</sup>  | 50.2 <sup>xx</sup> |
| Have you ever taken a screening test to know about your risk of being affected by cardiovascular disease? | 44.8*                  | 41.8*  | 53.5                | 50.8               | 37.6 <sup>x</sup>   | 32.1 <sup>x</sup>  |

\*,<sup>x</sup> Denotes significant difference between adjacent columns at  $p < 0.05$ .

<sup>xx</sup>, \*\* Denotes significant difference between adjacent columns at  $p < 0.001$

**Table S6.** Prediction of selected indicators of awareness

| <b>Characteristic (men provide the reference category)</b>                    | <b>OR</b> | <b>95% CI</b> | <b>p-value</b> |
|-------------------------------------------------------------------------------|-----------|---------------|----------------|
| Heart diseases is a main health issue for your gender*                        | 0.224     | 0.178 - 0.280 | .000           |
| Heart diseases is a leading cause of death for your gender*                   | 0.196     | 0.171 - 0.226 | .000           |
| Would call emergency services when suffering a heart attack*                  | 1.171     | 1.048 - 1.309 | .005           |
| Would call emergency services if somebody else suffered a heart attack*       | 1.258     | 1.108 - 1.428 | 0.000          |
| Knows main warning signs of a heart attack*                                   | 1.027     | 0.884 - 1.193 | .726           |
| Has taken a cardiovascular screening test ever*                               | 0.515     | 0.459 - 0.578 | .000           |
| Has suffered a heart attack**                                                 | 0.536     | 0.415 - 0.691 | .000           |
| Doctor has discussed risk factors*                                            | 0.460     | 0.408 - 0.518 | .000           |
| Would like more information on heart disease*                                 | 1.023     | 0.913 - 1.147 | .691           |
| I am informed about heart disease and the risk factors associated with it*    | 1.046     | 0.935 - 1.171 | .431           |
| Knows what to do and how to do it, when it comes to preventing heart disease* | 1.198     | 1.070 - 1.341 | .002           |

\*Adjusted for age, SES, educational level and history of prior heart attack

\*\* Adjusted for age, SES and educational level

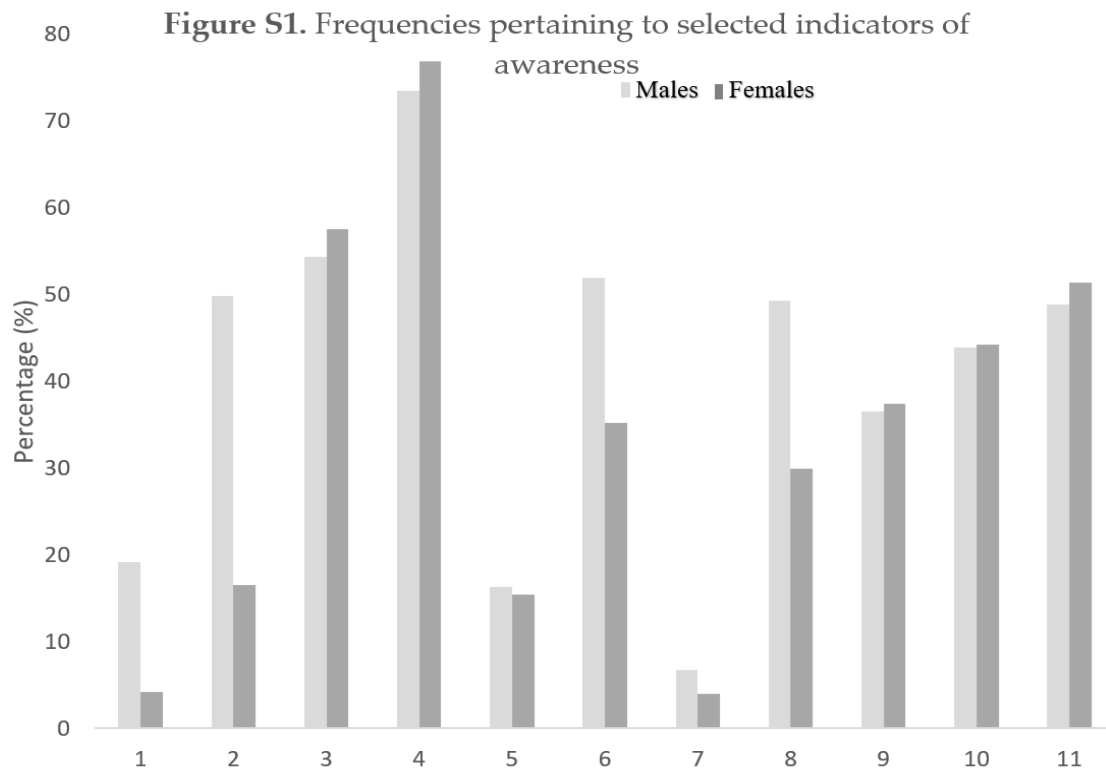

**Figure S1.** Bars represent weighted frequency of males and females reporting variables 1-11. 1) Heart diseases is a main health issue for your gender; 2) Heart diseases is a leading cause of death for your gender; 3) Would call emergency services when suffering a heart attack; 4) Would call emergency services if somebody else suffered a heart attack; 5) Knows main warning signs of a heart attack; 6) Has taken a cardiovascular screening test ever; 7) Has suffered a heart attack; 8) Doctor has discussed risk factors; 9) Would like more information on heart disease; 10) I am informed about heart disease and the risk factors associated with it; 11) Knows what to do and how to do it, when it comes to preventing heart disease.  $p < 0.05$  for variables 1-4, 6-8 and 11.
